# Supplementary material for: Assessing Accuracy of Genomic Predictions for Resistance to Infectious Hematopoietic Necrosis Virus With Progeny Testing of Selection Candidates in a Commercial Rainbow Trout Breeding Population
Source: Front Vet Sci. 2020 Nov 5;7:590048. doi: 10.3389/fvets.2020.590048 (PMC7674624; doi:10.3389/fvets.2020.590048)
Supplement: Supplementary file 3 [file Table_3.XLSX]

## Sheet: ADDITIONAL TABLE S3
ADDITIONAL TABLE S3 | Mixture parameter p and number of SNPs fitted by each ssBMR model used in GS for IHNV resistance.
Population	Analysis	Phenotypea	ssBMR model	Mixture parameter p	S.E.	Number Effective SNPs	SNPs fitted in Model	Note
CSF2016	GS	IHNV	BayesBp	0.9786	0.0211138	34640	741.296	Accuracy of GP with BayesBp is higher than with PBLUP
CSF2016	GS	IHNV	BayesCp	0.8049	0.186105	34640	6758.26	Accuracy of GP with BayesCp is equal to PBLUP
CSF2016	GS	IHNV	BayesBb	0.999	Na	34640	34.64	Accuracy of GP with BayesB run with p=0.999 is lower than PBLUP
CSF2016	GS	IHNV	BayesCb	0.999	Na	34640	34.64	Accuracy of GP with BayesC run with p=0.999 is lower than PBLUP
aIHNV resistance phenotype: binary fish survival status (STATUS) after IHNV challenge
bIn ssBMR run with BayesB and BayesC models, the mixture parameter was assumed to be known with value p=0.999
Conclusion:
IHNV resistance in rainbow trout might have a polygenic inheritance due to these facts:
(1) ssBMR models with large number of non-null effect SNPs (741-6,758) had higer GP accuracy than ssBMR models with 35 SNPs
(2) Accuracy of predictions is higher with ssGBLUP than with wssGBLUP and Bayesian variable selection models run with ssBMR
